# Supplementary material for: Bufalin inhibits epithelial-mesenchymal transition and increases radiosensitivity of non-small cell lung cancer via inhibition of the Src signaling
Source: PubMed Central journal article supplement — J Thorac Dis. 2023 Jan 16;15(1):123–34. doi: 10.21037/jtd-22-1859 (PMC9922603; doi:10.21037/jtd-22-1859), 2023-01-16
Supplement: jtd-15-01-123-rc.pdf [file jtd-15-01-123-rc.pdf]

## **Materials Design Analysis Reporting (MDAR) Checklist for Authors**

The MDAR framework establishes a minimum set of requirements in transparent reporting applicable to studies in the life sciences (see Statement of Task: [doi:10.31222/osf.io/9sm4x](https://doi.org/10.31222/osf.io/9sm4x)). The MDAR checklist is a tool for authors, editors and others seeking to adopt the MDAR framework for transparent reporting in manuscripts and other outputs. Please refer to the MDAR Elaboration Document for additional context for the MDAR framework.

**Materials**

|                                                                                                                                                                                                         |                                                                                                                                                                                                                                                                                                                                                                                                                                                                                                                                                                                                 |            |
|---------------------------------------------------------------------------------------------------------------------------------------------------------------------------------------------------------|-------------------------------------------------------------------------------------------------------------------------------------------------------------------------------------------------------------------------------------------------------------------------------------------------------------------------------------------------------------------------------------------------------------------------------------------------------------------------------------------------------------------------------------------------------------------------------------------------|------------|
| <b>Antibodies</b>                                                                                                                                                                                       | <b>Yes (indicate where provided: section/paragraph)</b>                                                                                                                                                                                                                                                                                                                                                                                                                                                                                                                                         | <b>n/a</b> |
| For commercial reagents, provide supplier name, catalogue number and RRID, if available.                                                                                                                | The antibodies used in this study were purchased from Cell Signaling Technology, including anti-Src (2123)(RRID:AB_2106047), anti-p-Y416-Src(2102)(RRID:AB_331697), anti-Stat3(12640)(RRID:AB_2799645), anti-p-Stat3(9145)(RRID:AB_965504), anti-E-cadherin(3195)(RRID:AB_2728822), anti-snail(3879)(RRID:AB_2255011), anti-snail2(9585)(RRID:AB_2239535), anti-Vimentin(5741)(RRID:AB_10695459), anti-N-cadherin(13116)(RRID:AB_2687616), Anti-Vinculin (4650)(AB_10559207), anti-GAPDH (5174)(RRID:AB_10622025), and anti- $\beta$ -actin (3700)(RRID:AB_2242334). (Western blot/paragraph 1) |            |
| <b>Cell materials</b>                                                                                                                                                                                   | <b>Yes (indicate where provided: section/paragraph)</b>                                                                                                                                                                                                                                                                                                                                                                                                                                                                                                                                         | <b>n/a</b> |
| <b>Cell lines:</b> Provide species information, strain. Provide accession number in repository <b>OR</b> supplier name, catalog number, clone number, <b>OR</b> RRID                                    | Three human NSCLC cell lines, H1299, A549, Hcc827, were acquired from the American Type Culture Collection (ATCC, Manassas, VA).(Cell culture/paragraph 1)                                                                                                                                                                                                                                                                                                                                                                                                                                      |            |
| <b>Primary cultures:</b> Provide species, strain, sex of origin, genetic modification status.                                                                                                           | The cells were cultured in DMEM, or RPMI 1640 medium (Gibco, Grand Island, NY, USA) supplemented with 10% fetal bovine serum (Gibco) and 1% antibiotics in a humidified atmosphere containing 5%CO <sub>2</sub> /95% air at 37 °C. (Cell culture/paragraph 1)                                                                                                                                                                                                                                                                                                                                   |            |
| <b>Experimental animals</b>                                                                                                                                                                             | <b>Yes (indicate where provided: section/paragraph)</b>                                                                                                                                                                                                                                                                                                                                                                                                                                                                                                                                         | <b>n/a</b> |
| <b>Laboratory animals:</b> Provide species, strain, sex, age, genetic modification status. Provide accession number in repository <b>OR</b> supplier name, catalog number, clone number, <b>OR</b> RRID | animals were not involved in this study.                                                                                                                                                                                                                                                                                                                                                                                                                                                                                                                                                        | n/a        |
| <b>Animal observed in or captured from the field:</b> Provide species, sex and age where possible                                                                                                       | animals were not involved in this study.                                                                                                                                                                                                                                                                                                                                                                                                                                                                                                                                                        | n/a        |
| <b>Model organisms:</b> Provide Accession number in repository (where relevant) <b>OR</b> RRID                                                                                                          | animals were not involved in this study.                                                                                                                                                                                                                                                                                                                                                                                                                                                                                                                                                        | n/a        |
| <b>Plants and microbes</b>                                                                                                                                                                              | <b>Yes (indicate where provided: section/paragraph)</b>                                                                                                                                                                                                                                                                                                                                                                                                                                                                                                                                         | <b>n/a</b> |
| <b>Plants:</b> provide species and strain, unique accession number if available, and source (including location for collected wild specimens)                                                           | Plants were not involved in this study.                                                                                                                                                                                                                                                                                                                                                                                                                                                                                                                                                         | n/a        |
| <b>Microbes:</b> provide species and strain, unique accession number if available, and source                                                                                                           | Microbes were not involved in this study.                                                                                                                                                                                                                                                                                                                                                                                                                                                                                                                                                       | n/a        |
| <b>Human research participants</b>                                                                                                                                                                      | <b>Yes (indicate where provided: section/paragraph)</b>                                                                                                                                                                                                                                                                                                                                                                                                                                                                                                                                         | <b>n/a</b> |
| Identify authority granting ethics approval (IRB or equivalent committee(s), provide reference number for approval.                                                                                     | This study does not involve human experiments.                                                                                                                                                                                                                                                                                                                                                                                                                                                                                                                                                  | n/a        |
| Provide statement confirming informed consent obtained from study participants.                                                                                                                         | This study does not involve human experiments.                                                                                                                                                                                                                                                                                                                                                                                                                                                                                                                                                  | n/a        |
| Report on age and sex for all study participants.                                                                                                                                                       | This study does not involve human experiments.                                                                                                                                                                                                                                                                                                                                                                                                                                                                                                                                                  | n/a        |

**Design**

|                                                                                                                                                                     |                                                                     |            |
|---------------------------------------------------------------------------------------------------------------------------------------------------------------------|---------------------------------------------------------------------|------------|
| <b>Study protocol</b>                                                                                                                                               | <b>Yes (indicate where provided: section/paragraph)</b>             | <b>n/a</b> |
| For clinical trials, provide the trial registration number <b>OR</b> cite DOI in manuscript.                                                                        | This study does not involve human experiments and clinical studies  | n/a        |
| <b>Laboratory protocol</b>                                                                                                                                          | <b>Yes (indicate where provided: section/paragraph)</b>             | <b>n/a</b> |
| Provide DOI or other citation details if detailed step-by-step protocols are available.                                                                             | This study does not involve human experiments and clinical studies  | n/a        |
| <b>Experimental study design (statistics details)</b>                                                                                                               | <b>Yes (indicate where provided: section/paragraph)</b>             | <b>n/a</b> |
| State whether and how the following have been done, <b>or</b> if they were not carried out.                                                                         |                                                                     |            |
| Sample size determination                                                                                                                                           | This study does not involve a related Experimental                  | n/a        |
| Randomisation                                                                                                                                                       | This study does not involve a related Experimental                  | n/a        |
| Blinding                                                                                                                                                            | This study does not involve a related Experimental                  | n/a        |
| Inclusion/exclusion criteria                                                                                                                                        | This study does not involve a related Experimental                  | n/a        |
| <b>Sample definition and in-laboratory replication</b>                                                                                                              | <b>Yes (indicate where provided: section/paragraph)</b>             | <b>n/a</b> |
| State number of times the experiment was replicated in laboratory                                                                                                   | 3 or more times(Statistical analysis/paragraph 1)                   |            |
| Define whether data describe technical or biological replicates                                                                                                     | technical replicates(Statistical analysis/paragraph 1)              |            |
| <b>Ethics</b>                                                                                                                                                       | <b>Yes (indicate where provided: section/paragraph)</b>             | <b>n/a</b> |
| Studies involving human participants: State details of authority granting ethics approval (IRB or equivalent committee(s), provide reference number for approval.   | This study does not involve human experiments and clinical studies. | n/a        |
| Studies involving experimental animals: State details of authority granting ethics approval (IRB or equivalent committee(s), provide reference number for approval. | This study does not involve animal experiments.                     | n/a        |
| Studies involving specimen and field samples: State if relevant permits obtained, provide details of authority approving study; if none were required, explain why. | Specimens and field samples were not involved in this study.        | n/a        |
| <b>Dual Use Research of Concern (DURC)</b>                                                                                                                          | <b>Yes (indicate where provided: section/paragraph)</b>             | <b>n/a</b> |
| If study is subject to dual use research of concern, state the authority granting approval and reference number for the regulatory approval                         | DURC was not involved in this study.                                | n/a        |

**Analysis**

| <b>Attrition</b>                                                                                                                              | <b>Yes (indicate where provided: section/paragraph)</b>                                                                                                                                            | <b>n/a</b> |
|-----------------------------------------------------------------------------------------------------------------------------------------------|----------------------------------------------------------------------------------------------------------------------------------------------------------------------------------------------------|------------|
| State if sample or data point from the analysis is excluded, and whether the criteria for exclusion were determined and specified in advance. | This study does not involve animal experiments.                                                                                                                                                    | n/a        |
| <b>Statistics</b>                                                                                                                             | <b>Yes (indicate where provided: section/paragraph)</b>                                                                                                                                            | <b>n/a</b> |
| Describe statistical tests used and justify choice of tests.                                                                                  | All quantitative data were presented as mean $\pm$ SD. Student t-test was used to compare the group differences. P0.05 was considered statistically significant.(Statistical analysis/paragraph 1) |            |
| <b>Data Availability</b>                                                                                                                      | <b>Yes (indicate where provided: section/paragraph)</b>                                                                                                                                            | <b>n/a</b> |
| State whether newly created datasets are available, including protocols for access or restriction on access.                                  | This study does not involve newly created datasets                                                                                                                                                 | n/a        |
| If data are publicly available, provide accession number in repository or DOI or URL.                                                         | This study does not involve newly created datasets                                                                                                                                                 | n/a        |
| If publicly available data are reused, provide accession number in repository or DOI or URL, where possible.                                  | This study did not use publicly available data                                                                                                                                                     | n/a        |
| <b>Code Availability</b>                                                                                                                      | <b>Yes (indicate where provided: section/paragraph)</b>                                                                                                                                            | <b>n/a</b> |
| For all newly generated code and software essential for replicating the main findings of the study:                                           |                                                                                                                                                                                                    |            |
| State whether the code or software is available.                                                                                              | This study does not address the use of code                                                                                                                                                        | n/a        |
| If code is publicly available, provide accession number in repository, or DOI or URL.                                                         | This study does not address the use of code                                                                                                                                                        | n/a        |

**Reporting**

| <b>Adherence to community standards</b>                                                                                                                                                                                                  | <b>Yes (indicate where provided: section/paragraph)</b>                                       | <b>n/a</b> |
|------------------------------------------------------------------------------------------------------------------------------------------------------------------------------------------------------------------------------------------|-----------------------------------------------------------------------------------------------|------------|
| MDAR framework recommends adoption of discipline-specific guidelines, established and endorsed through community initiatives. Journals have their own policy about requiring specific guidelines and recommendations to complement MDAR. |                                                                                               |            |
| State if relevant guidelines (eg., ICMJE, MIBBI, ARRIVE) have been followed, and whether a checklist (eg., CONSORT, PRISMA, ARRIVE) is provided with the manuscript.                                                                     | ICMJE guidelines were followed, as the journal follows ICMJE recommendations for publication. |            |

Article information: <https://dx.doi.org/10.21037/jtd-22-1859>
